# Supplementary material
Source: PubMed Central journal article supplement (PMC1924591)

**a**

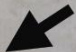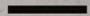

NuMA

**b**

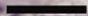

H&E

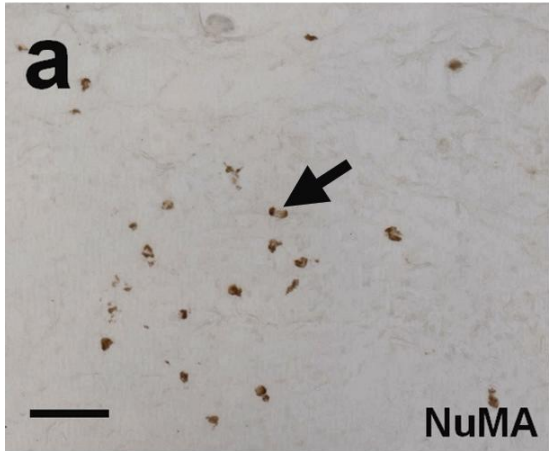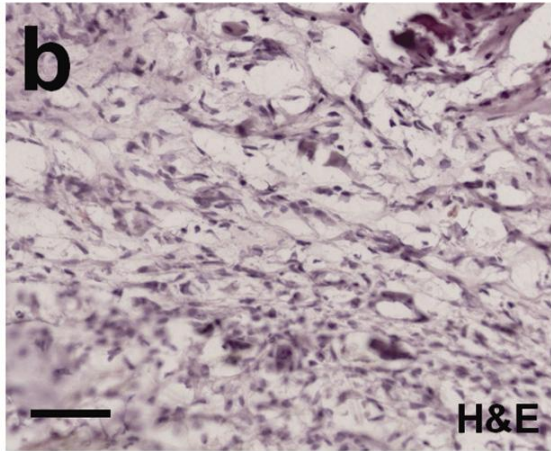

Supplement: pnas_0704581104_1.pdf [file pnas_0704581104_1.pdf]
